# Supplementary material for: Regulation of distinct STAT3 dynamics in pro (IFNγ) and anti (IL-10) inflammatory pathways and in their cross-talk: insights from a data-driven model
Source: bioRxiv or medRxiv preprint supplement (doi:10.1101/425868), 2019-09-24
Supplement: Supplementary file [file media-2.pdf]

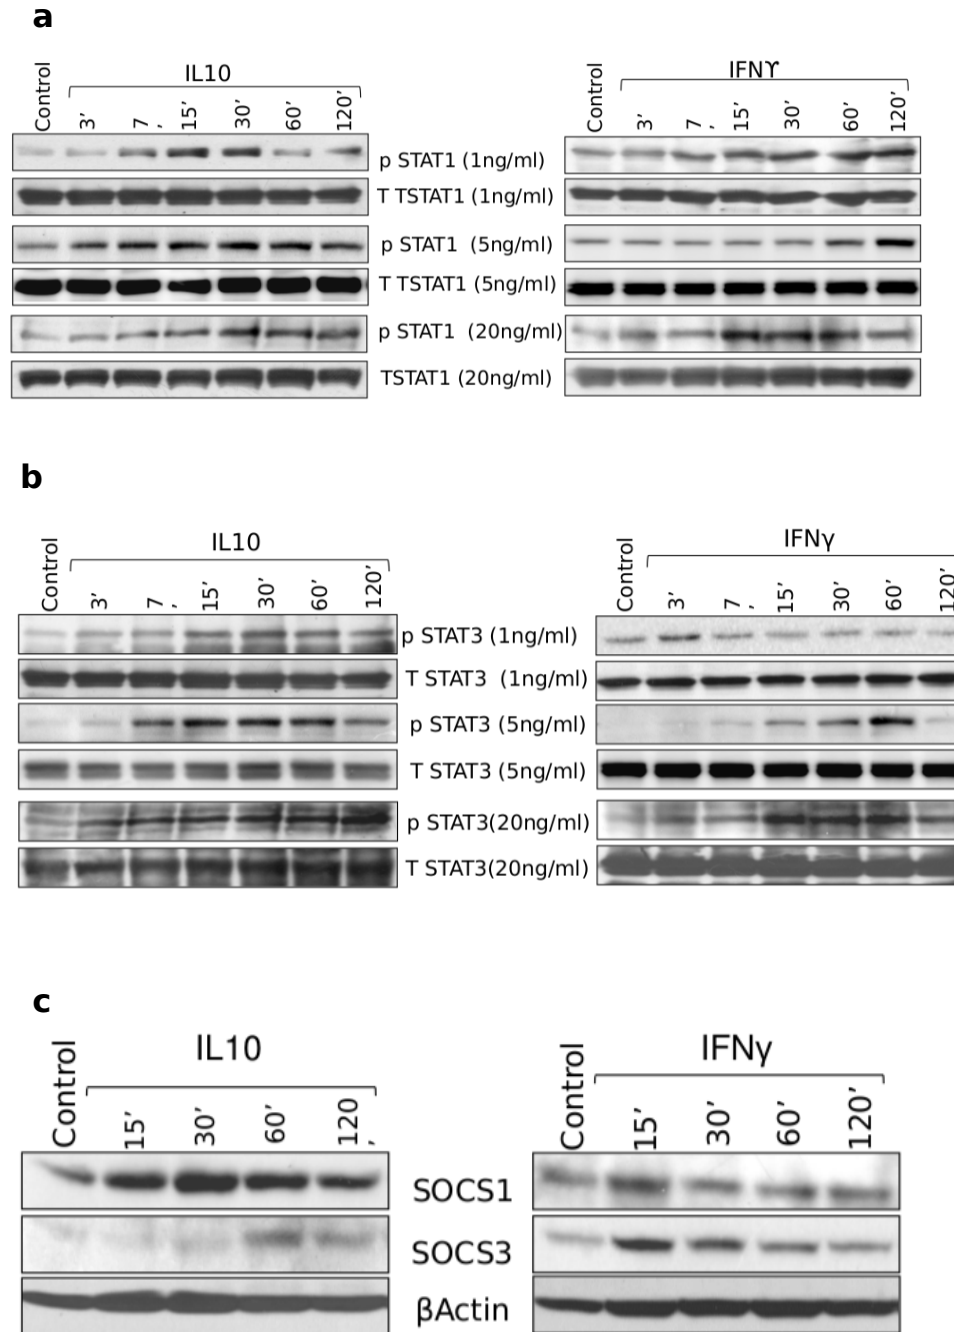

Figure S1

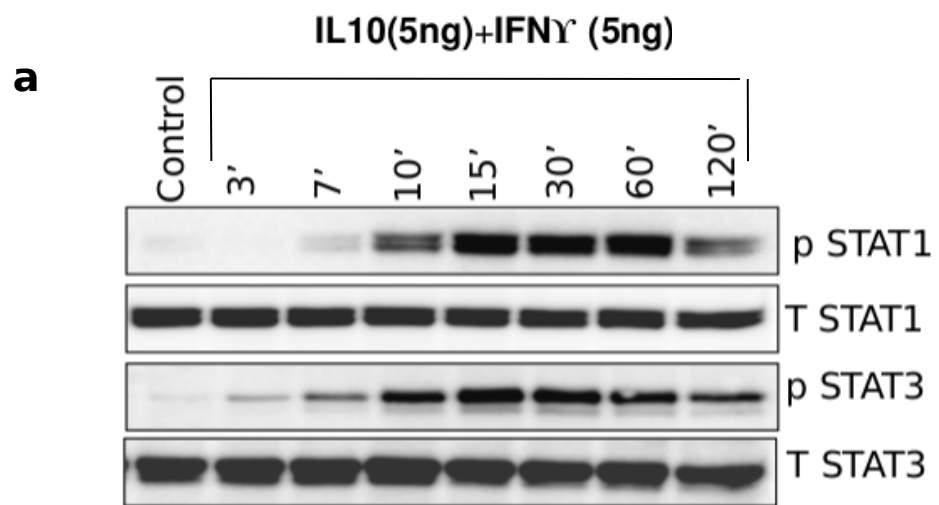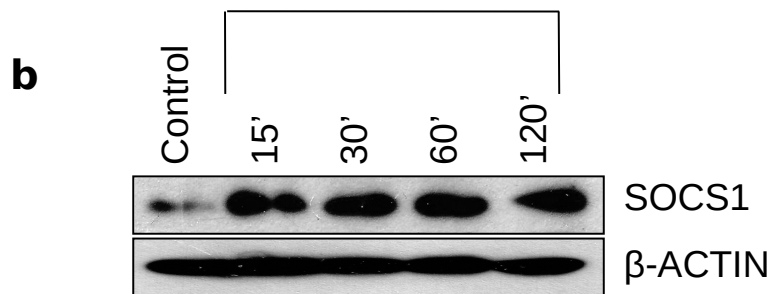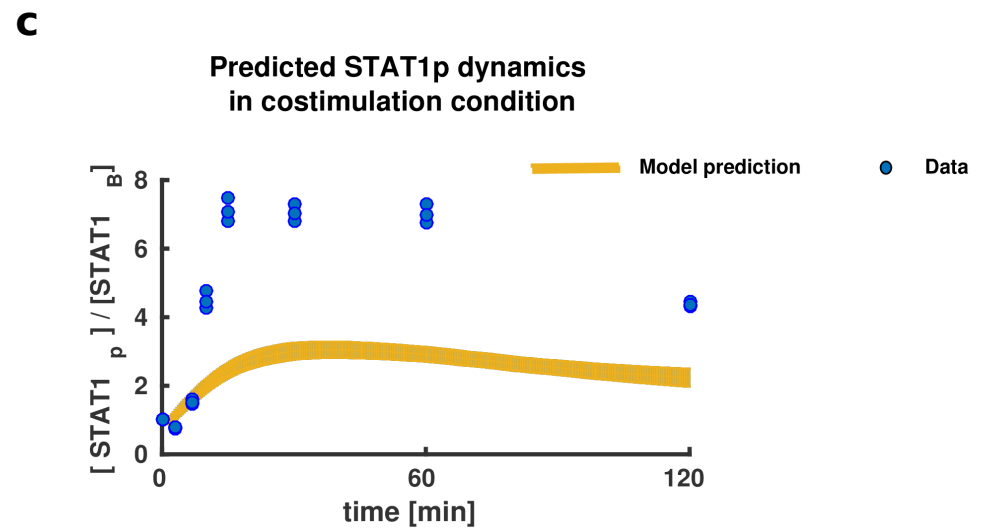

Figure S2

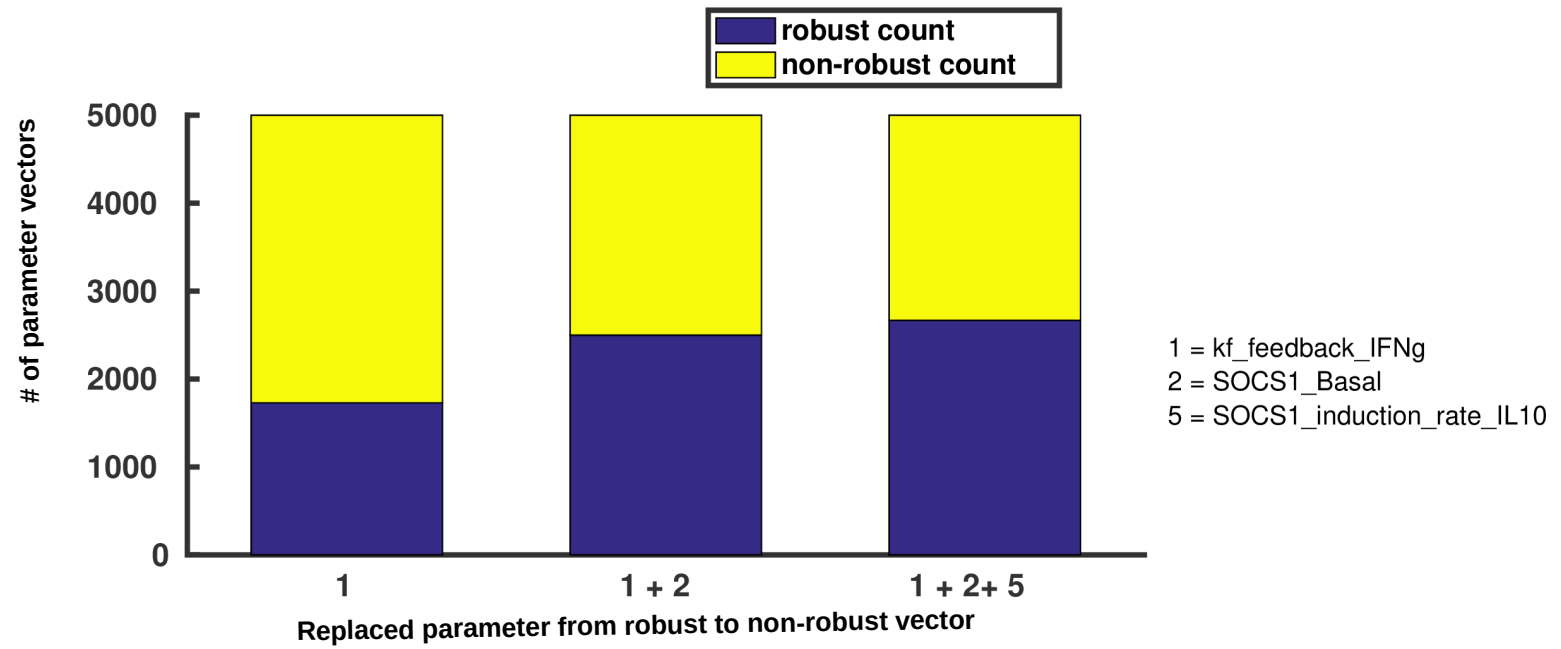

Figure S3
